# Supplementary material for: The role of modelling and analytics in South African COVID-19 planning and budgeting
Source: PubMed Central journal article supplement (PMC10317222; doi:10.1371/journal.pgph.0001063), 2023-07-03
Supplement: pgph.0001063.s001.pdf [file pgph.0001063.s001.pdf]

## Supplementary material for

### The Role of Modelling and Analytics in South African COVID-19 Planning and Budgeting

Gesine Meyer-Rath, Rachel A Hounsell, Juliet RC Pulliam, Lise Jamieson, Brooke E Nichols, Harry Moultrie, Sheetal P Silal

**Table A: SACMC contributions over time (2020-2021)**

| <i>Date</i> | <i>Event</i>                 | <i>Description</i>                                                                                                                                   |
|-------------|------------------------------|------------------------------------------------------------------------------------------------------------------------------------------------------|
| 05/03/2020  | 1st COVID-19 case in SA      | First case in South Africa reported                                                                                                                  |
| 23/03/2020  | SACMC formed                 | SACMC formed by the National Department of Health (NDOH). Core modelling team comprised of modellers from MASHA, SACEMA, HE <sup>2</sup> RO and NICD |
| 03/04/2020  | 1st NCCM results             | First cost results shared with policy makers                                                                                                         |
| 14/04/2020  | 1st NCEM projections         | First short- and long-term provincial- and national-level epi projections shared with policy makers                                                  |
| 06/05/2020  | NCEM public release (1,2)    | First reports on short- and long-term epi projections made public                                                                                    |
| 06/05/2020  | NCCM budget projections      | Data for COVID-19 health budget for 2020/21 shared with NDOH                                                                                         |
| 23/05/2020  | Special Adjustment Budget    | COVID-19 health budget for 2020/21 announced                                                                                                         |
| 12/06/2020  | NCEM public release (3)      | Updates to short-term epi projections made public                                                                                                    |
| 03/07/2020  | NCEM district projections    | District-level long-term epi projections shared with policy makers                                                                                   |
| 10/07/2020  | NCEM Dashboard               | Launch of National COVID-19 Epi Model Dashboard                                                                                                      |
| 21/07/2020  | Scenarios (1)                | Updates to long-term projections incorporating behavioural scenarios shared with policy makers                                                       |
| 15/08/2020  | Scenarios (2)                | Updates to long-term projections incorporating behavioural heterogeneity shared with policy makers                                                   |
| 06/09/2020  | NCEM public release (4)      | Report on long-term projections incorporating behavioural scenarios made public                                                                      |
| 17/09/2020  | COVAX CEA                    | Cost-effectiveness analysis of accessing COVID-19 vaccines through COVAX                                                                             |
| 17/11/2020  | SACMC Epidemic Explorer      | Launch of SACMC Epidemic Explorer                                                                                                                    |
| 21/11/2020  | 1st vaccination budget       | First full vaccination budget estimates                                                                                                              |
| 15/01/2021  | SACMC provincial reports (1) | Overview of second wave dynamics by province shared with provincial NDOH staff and advisors                                                          |
| 18/01/2021  | SACMC brief (1)              | First epidemic update brief to MAC and policy makers                                                                                                 |
| 26/01/2021  | NCCM 2021/22 budget          | Data for COVID-19 health budget for 2021/22 shared with NDOH, incorporating potential additional waves                                               |
| 06/04/2021  | 3rd wave projections (1)     | Report on 3 <sup>rd</sup> wave projections considering hypothetical variant scenarios shared with policy makers                                      |
| 29/04/2021  | NCEM public release (5)      | Report on 3 <sup>rd</sup> wave projections considering hypothetical variant scenarios made public                                                    |
| 03/05/2021  | SACMC memo (1)               | Guide to interpretation of resurgence metrics shared with provincial- and national-level policy makers                                               |
| 04/05/2021  | SACMC brief (2)              | Epidemic update brief to MAC and policy makers                                                                                                       |

**Table S1 cont'd**

| <i>Date</i> | <i>Event</i>                                   | <i>Description</i>                                                                                                           |
|-------------|------------------------------------------------|------------------------------------------------------------------------------------------------------------------------------|
| 14/05/2021  | SACMC brief (3)                                | Epidemic update brief to MAC and policy makers                                                                               |
| 14/05/2021  | SACMC memo (2)                                 | Expectations for the timing of the third wave shared with MoH                                                                |
| 26/05/2021  | Short-term forecasting                         | Results of short-term forecasts shared with policy makers, and shortly thereafter launched on Epidemic Explorer              |
| 09/06/2021  | SACMC brief (4)                                | Epidemic update brief to MAC and policy makers                                                                               |
| 06/07/2021  | 3rd wave projections (2)                       | Report on 3 <sup>rd</sup> wave projections considering Delta variant shared with policy makers                               |
| 08/07/2021  | SACMC brief (5)                                | Epidemic update brief to MAC and policy makers                                                                               |
| 13/07/2021  | NCEM public release (6)                        | Report on 3 <sup>rd</sup> wave projections considering Delta variant made public                                             |
| 01/08/2021  | Tekanelo inception                             | Begin of new project to jointly consider the epi and macro-economic impact of COVID-19                                       |
| 11/08/2021  | SACMC brief (7)                                | Epidemic update brief to MAC and policy makers                                                                               |
| 04/09/2021  | SACMC brief (8)                                | Epidemic update brief to MAC and policy makers                                                                               |
| 28/10/2021  | NCEM 4th wave scenarios                        | Report on 4 <sup>th</sup> wave projections considering hypothetical new variant scenarios                                    |
| 25/11/2021  | Reinfection signal                             | Presentation on new signal in reinfections analysis suggesting emergence of a new immune escape variant                      |
| 28/11/2021  | SACMC brief (9)                                | Epidemic update brief to MAC and policy makers                                                                               |
| 03/12/2021  | Omicron transmissibility & immune escape brief | Updated brief to IMT on bounding transmissibility and immune escape of the Omicron variant                                   |
| 13/12/2021  | NCEM Omicron scenarios                         | Updated 4th wave projections considering emerging Omicron variant characteristics                                            |
| 15/12/2021  | SACMC provincial reports (2)                   | Situation reports on trends in hospital admissions in all provinces shared with provincial- and national-level policy makers |

### **National COVID-19 Epi Model (NCEM) adaptations from March 2020 to December 2021**

The NCEM is a stochastic compartmental transmission model to estimate the total and reported incidence, admissions and deaths of COVID-19 in the nine provinces of South Africa. The outputs of the model may be used to inform resource requirements and predict where gaps could arise based on the available resources within the South African health system. The model follows a generalised Susceptible-Exposed-Infectious-Recovered (SEIR) structure accounting for disease severity (asymptomatic, mild, severe and critical cases) and the treatment pathway (outpatients, non-ICU and ICU beds). Figures S1-6 detail the structural development of the NCEM from March 2020 to December 2021 in response to requests for model outputs and the drivers of infection in South Africa.

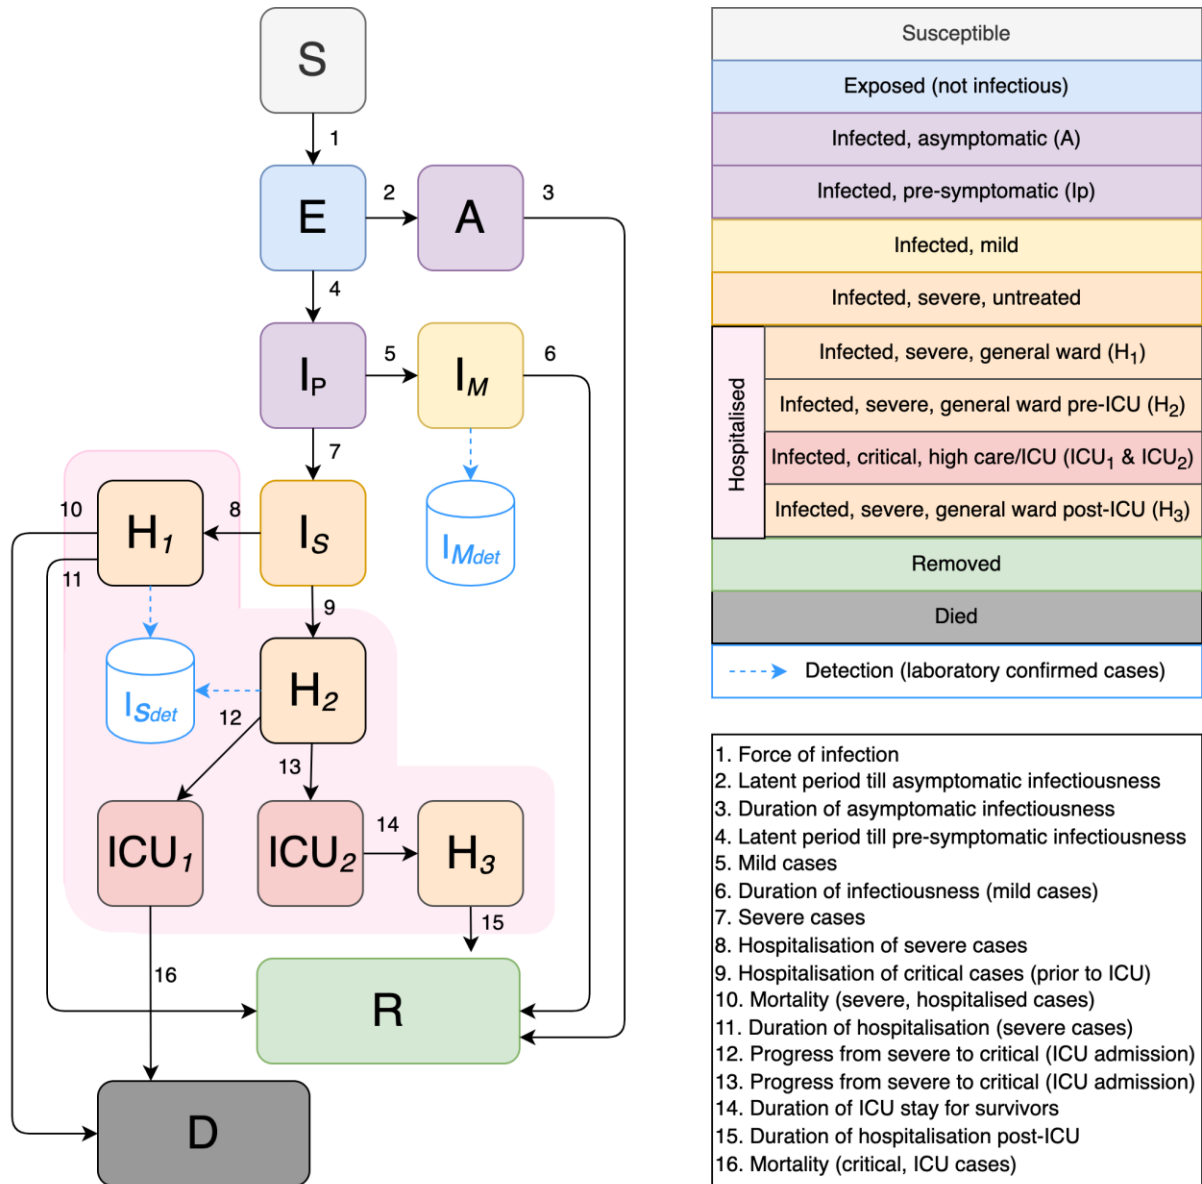

Figure A: NCEM v1 Dynamic compartmental structure accounting for clinical profile of infection and hospital pathway

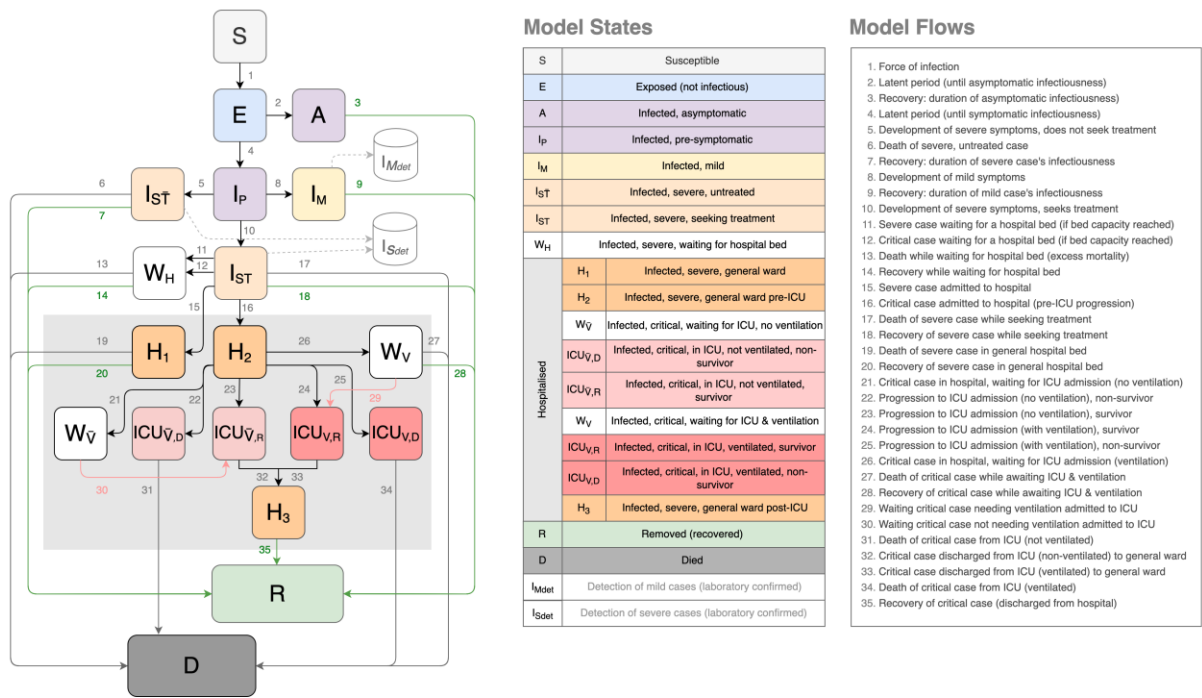

**Figure B: NCEM v2-3** Dynamic compartmental structure accounting for clinical profile of infection and hospital pathway. Additional features in v2 include limits on hospital capacity, <100% medical attendance for severe illness and ICU hospital pathway stratified by use of mechanical ventilation. NCEM v3 expands this structure through a spatially-explicit application to 52 districts in South Africa.

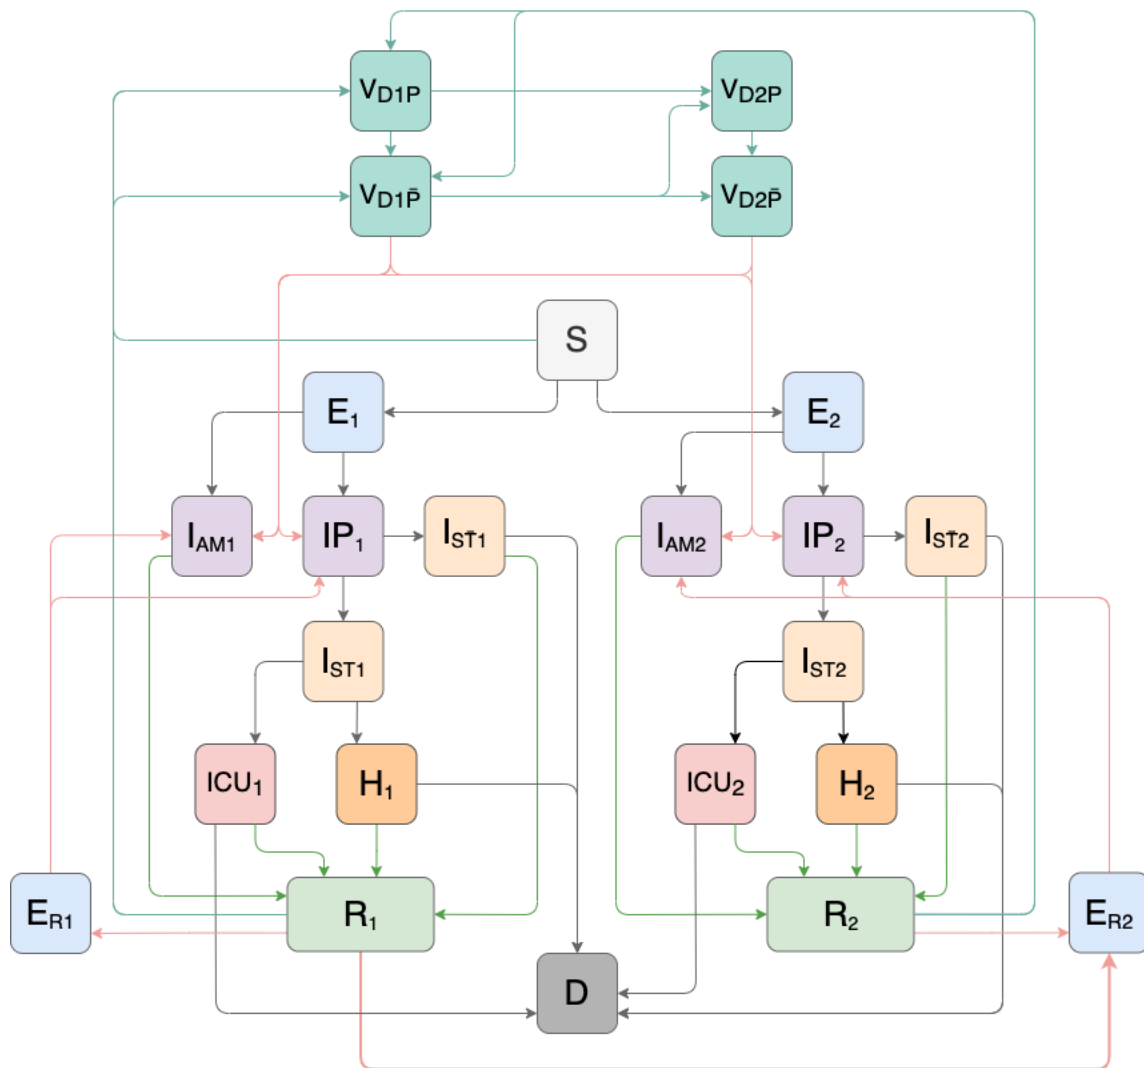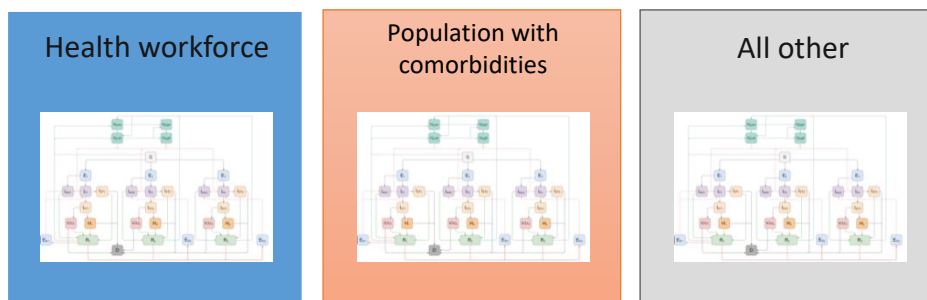

**Figure C: NCEM v4** Dynamic compartmental structure accounting for clinical profile of infection and hospital pathway. Additional features in v4 include a stratification by strain of infection to account for transmission of both Wild type SARS-CoV-2 and the Beta variant. Reinfection and cross-infection are also included. The model is additionally stratified by 7 age groups and three subpopulations. Vaccination is included to account for vaccine effectiveness against infection and severity for a generic vaccine.

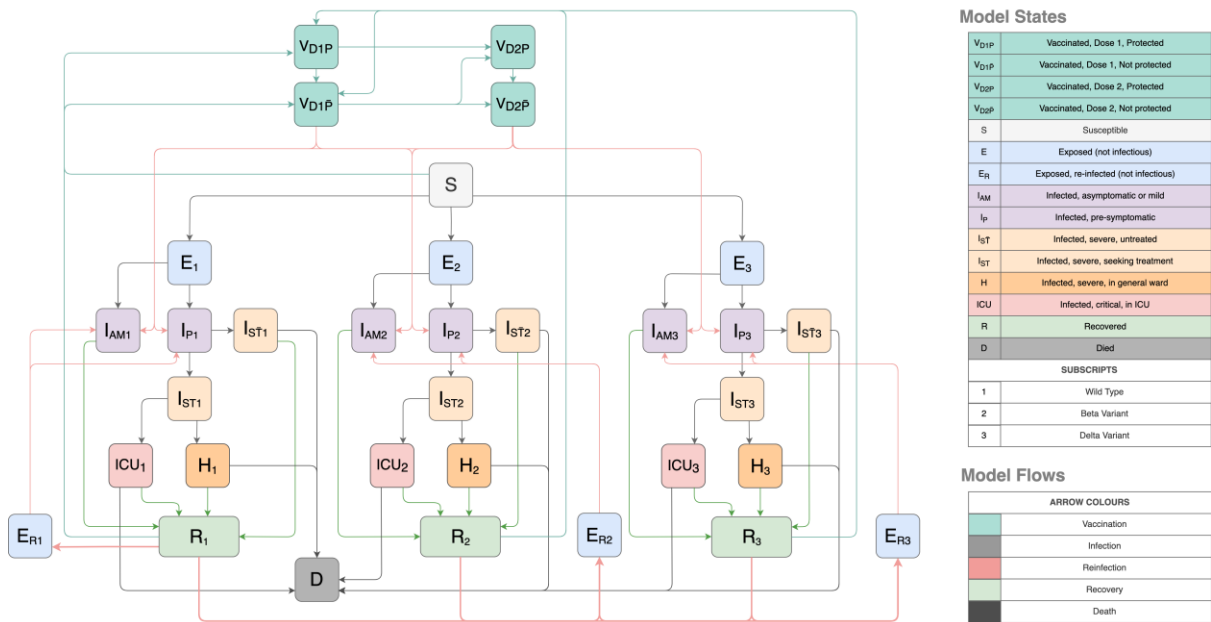

Figure D: NCEM v5 Dynamic compartmental structure accounting for clinical profile of infection and hospital pathway. Additional features in v5 an additional stratification for transmission of the Delta variant.

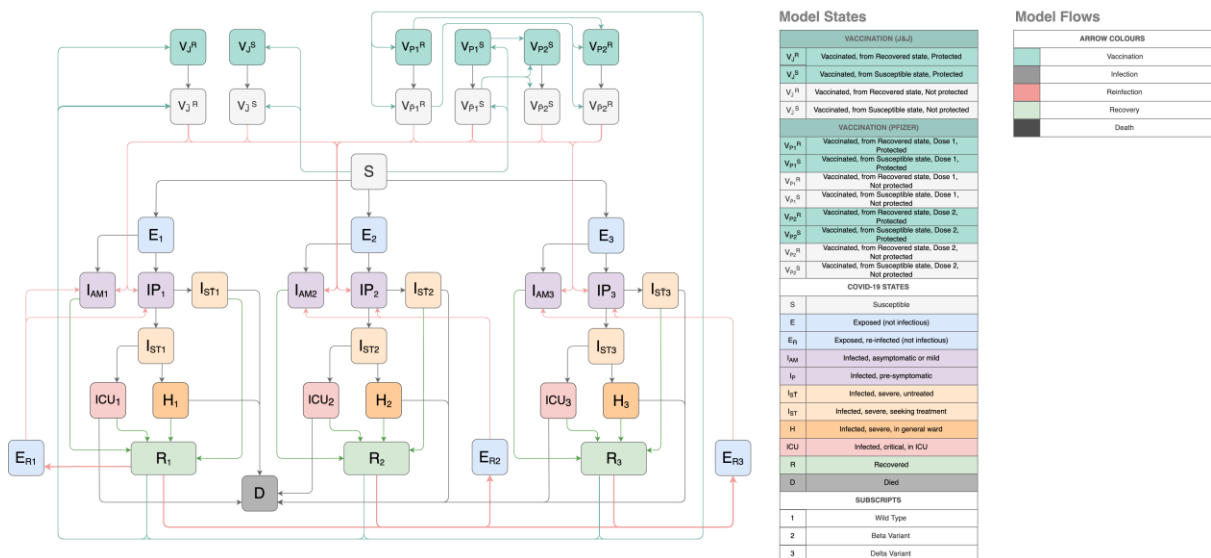

Figure E: NCEM v6 Dynamic compartmental structure accounting for clinical profile of infection and hospital pathway. Additional features in v6 include vaccination pathways for specific vaccines (Comirnaty and Janssen), accounting for differential vaccine efficacy based on previous infection

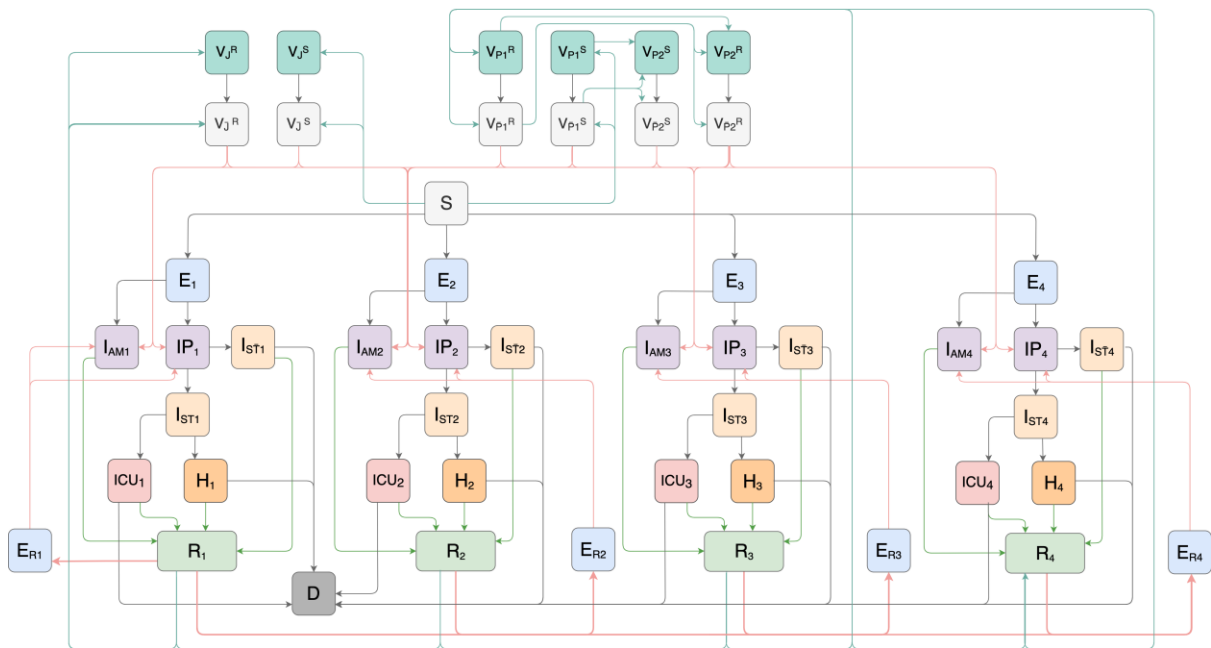

| Transmission States |                                       | Vaccination States   |                                                           | Variants   |                 | Transitions   |             |
|---------------------|---------------------------------------|----------------------|-----------------------------------------------------------|------------|-----------------|---------------|-------------|
| COVID-19 STATES     |                                       | VACCINATION (J&J)    |                                                           | SUBSCRIPTS |                 | ARROW COLOURS |             |
| S                   | Susceptible                           | $V_J^R$              | Vaccinated, from Recovered state, Protected               | 1          | Wild Type       |               | Vaccination |
| E                   | Exposed (not infectious)              | $V_J^S$              | Vaccinated, from Susceptible state, Protected             | 2          | Beta Variant    |               | Infection   |
| $E_R$               | Exposed, re-infected (not infectious) | $V_{P1}^R$           | Vaccinated, from Recovered state, Not protected           | 3          | Delta Variant   |               | Reinfection |
| $I_{AM}$            | Infected, asymptomatic or mild        | $V_{P1}^S$           | Vaccinated, from Susceptible state, Not protected         | 4          | Omicron Variant |               | Death       |
| $I_P$               | Infected, pre-symptomatic             | VACCINATION (PFIZER) |                                                           |            |                 |               |             |
| $I_{ST}$            | Infected, severe, untreated           | $V_{P1}^R$           | Vaccinated, from Recovered state, Dose 1, Protected       |            |                 |               |             |
| $I_{ST}$            | Infected, severe, seeking treatment   | $V_{P1}^S$           | Vaccinated, from Susceptible state, Dose 1, Not protected |            |                 |               |             |
| H                   | Infected, severe, in general ward     | $V_{P2}^R$           | Vaccinated, from Recovered state, Dose 2, Protected       |            |                 |               |             |
| ICU                 | Infected, critical, in ICU            | $V_{P2}^S$           | Vaccinated, from Susceptible state, Dose 2, Not protected |            |                 |               |             |
| R                   | Recovered                             |                      |                                                           |            |                 |               |             |
| D                   | Died                                  |                      |                                                           |            |                 |               |             |

Figure F: NCEM v7 Dynamic compartmental structure accounting for clinical profile of infection and hospital pathway. Additional features in v7 include an additional stratification for the Omicron variant.
